April 2011

# PSYCHIATRIC SERVICES

A Journal of the  
American Psychiatric  
Association

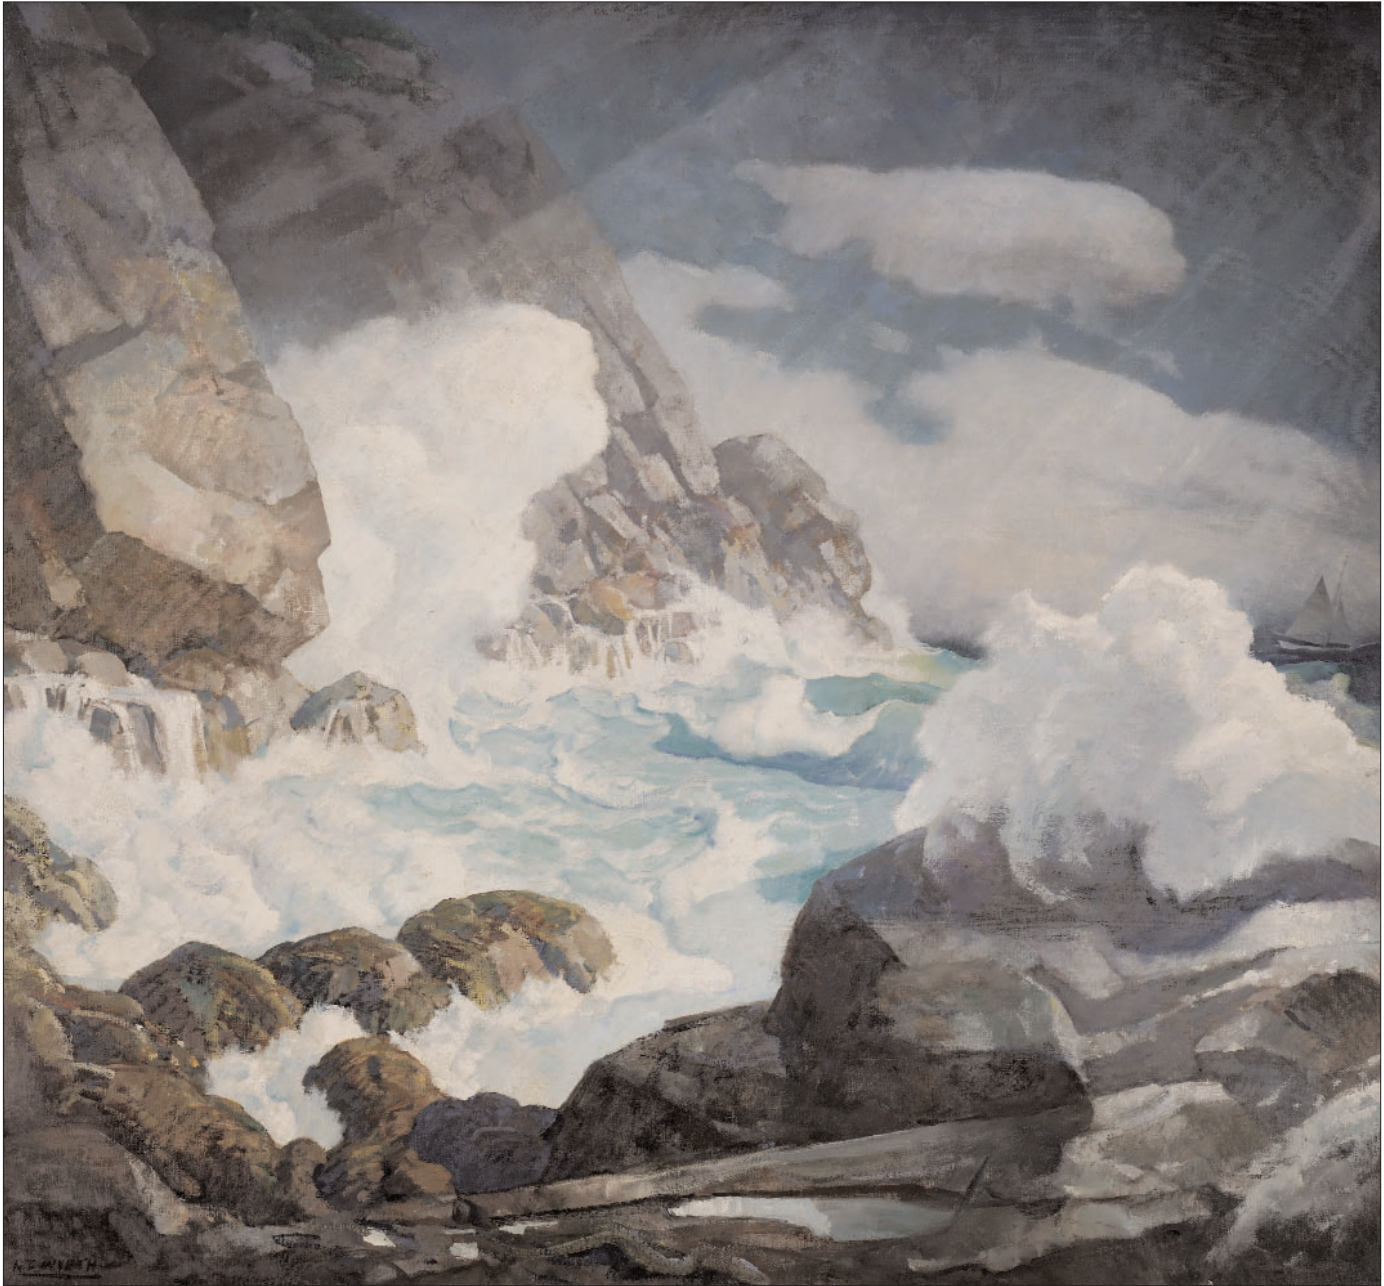

◆ Trends in Spending on Behavioral Health Care for Veterans, 2000–2007

◆ Smoking and Mental Illness: Enhancing Motivation With Electronic Decision Support

◆ New York's Parity Benefits: Are Health Plans Getting the Message Out to Enrollees?
